# Supplementary material for: Ca2+/Calmodulin-Dependent AtSR1/CAMTA3 Plays Critical Roles in Balancing Plant Growth and Immunity
Source: MDPI journal article supplement (doi:10.3390/ijms19061764), 2018-06-14
Supplement: s1 [file s1]

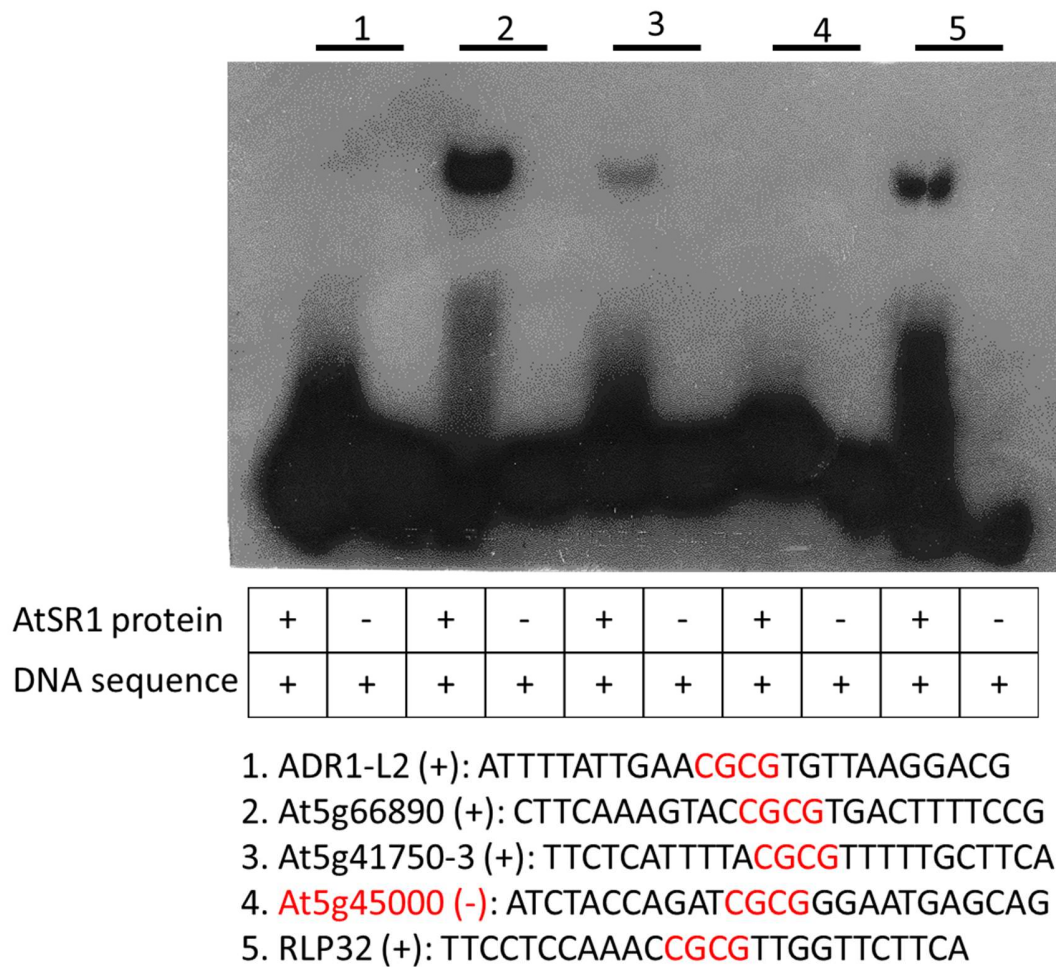

**Figure S1.** Promoter fragments of defense-related genes and purified recombinant AtSR1 protein were used in EMSA assay.

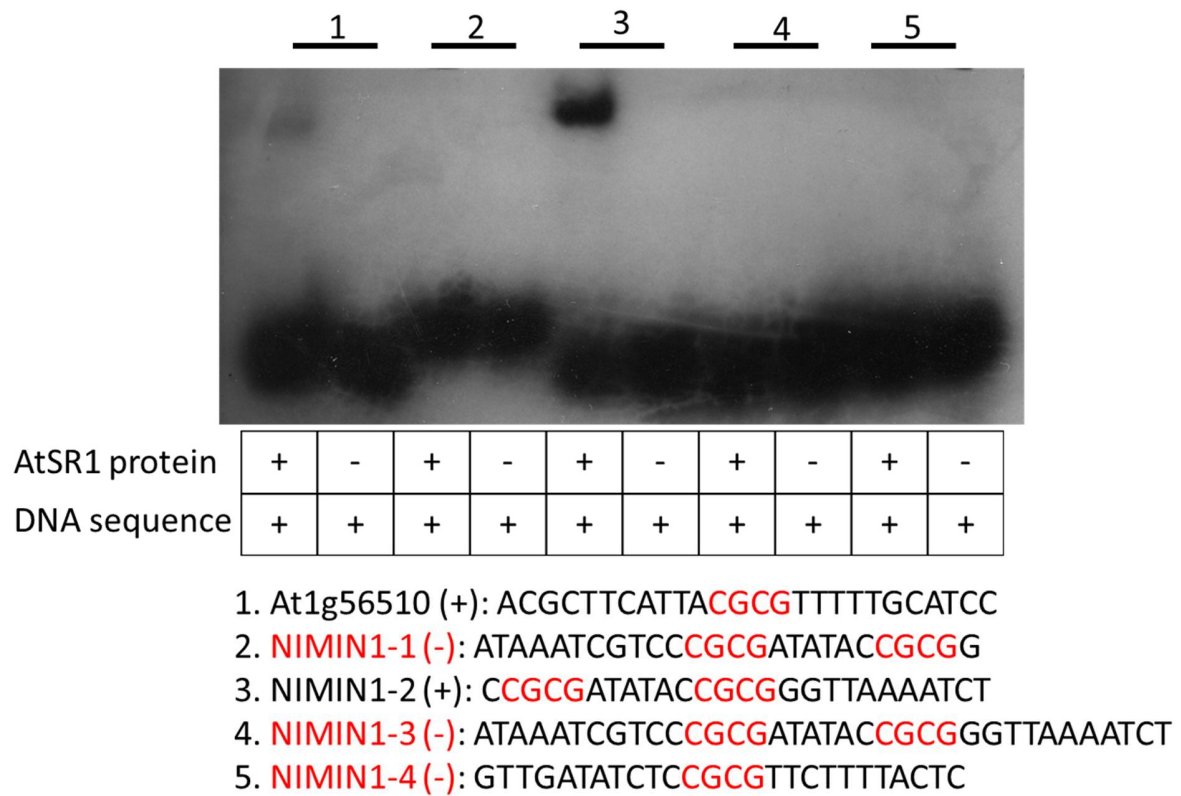

**Figure S2.** Promoter fragments of defense-related genes and purified recombinant AtSR1 protein were used in EMSA assay.

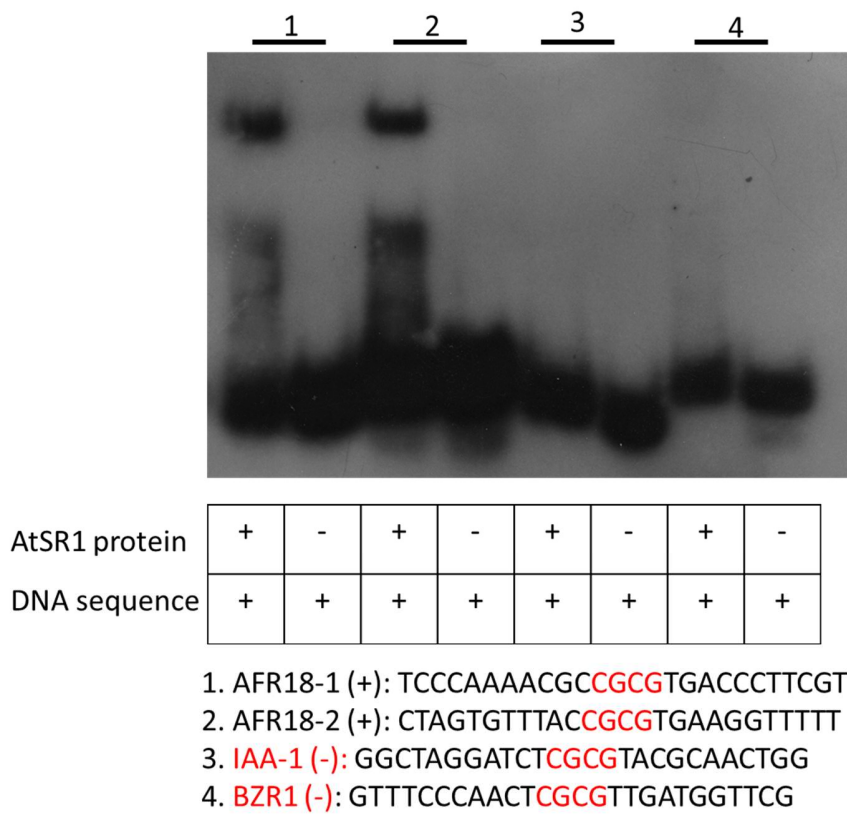

**Figure S3.** Promoter fragments of growth-related genes and purified recombinant AtSR1 protein were used in EMSA assay.

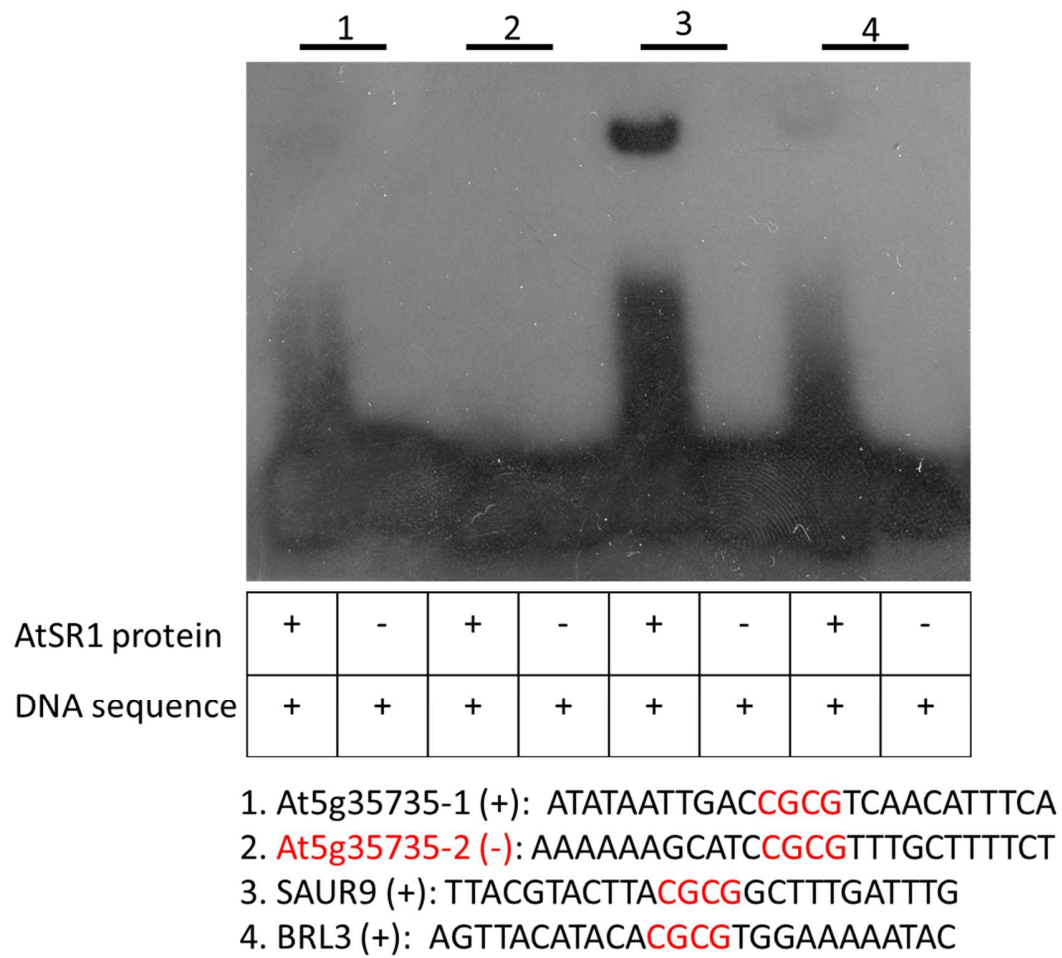

**Figure S4.** Promoter fragments of growth-related genes and purified recombinant AtSR1 protein were used in EMSA assay.
