# Supplementary material for: Ca2+/Calmodulin-Dependent AtSR1/CAMTA3 Plays Critical Roles in Balancing Plant Growth and Immunity
Source: MDPI journal article supplement (doi:10.3390/ijms19061764), 2018-06-14
Supplement: s1 [file s1]

Supplementary Table 6. List of primers for ChIP-PCR for defense related genes

| Gene Name/ID | Forward primer               | Reverse primer            |
|--------------|------------------------------|---------------------------|
| At5g04720    | GCTATGGTGCCACTTCTAT          | CTACGGAGACCCAATAAAGA      |
| At5g45000    | TTTGCTTTGCAGGCTTAC           | TCTGGTATAGTCACTTTCTAAA    |
| At5g66890    | GAACAGAGTTATTCACCAAC         | TTGACCGACTCTTTCTTTG       |
| At5g41750    | TCAGTTCCAGTTACATTCCA         | GAGAAACCCTTTACGGACAT      |
| RLP32        | GCGTTGGTTCTTCAAGGTGTT        | CGTCTTCAATTCCGTGATTTAGG   |
| ADR1         | GGAGCTGGACCAACACTA           | GGATTAGGGACTCGAACTTT      |
| At1g56510    | GTTATGTACGCTTCATTACG         | AGACATTGTATCTCCAGTTG      |
| NIMIN1       | AATAAATCGTCCCGCGATATACC      | ATCTCATATTGTCGGCCACTTG    |
| PDF1.4       | GCATAGGCGAAGAACAAGAAGTA      | AGCACATGACTCATCTCATCTCA   |
| NPR1         | AATATGTGATGCTATTGAGTTATAGAGA | GCCTATGAATACAACAACGTAAGAT |

Supplementary Table 7. List of primers for ChIP-PCR for growth related genes

| Gene Name/ID   | Forward primer               | Reverse primer            |
|----------------|------------------------------|---------------------------|
| At5g35735      | ACGAGAGGGAAGGGAATTGAA        | GCCTACATACATATCGCCTCAG    |
| IAA1           | GTGTGGTAGAAGGACGAAGGT        | GGAGCATGAGGAGGCAAGTT      |
| IAA19          | GACCACCGCATCCTCAGTT          | GAACCTTCTTCTCCTACACTTCTCT |
| SAUR41         | TCTTGTCGGGCAGATAAACTAT       | GAAGATTACACGACCAAGAAGTC   |
| SAUR9          | TTGAAGAGATCATATAAGATAATGTACG | TTTGGATGATTTGTGACTAGGTTAT |
| ARF18          | ATCCAACAGTGCCTGAATTACG       | AGAAGAAGAAGTAGAAGGAGAGGAA |
| BRL3           | AAGTCACGAGAGGGCATA           | CGTCTCACGCTTCCATAA        |
| BZR1           | CGTTACTAAGCGTAGTTATCCTCTG    | CTGGAATCGAAGAAGAAGAATCTCT |
| DWF4           | CGCTCAAAGTATGTTATCTAGTAGG    | AGATTATTACCGAACTGGACAGTC  |
| EDS1 (control) | TGGCTTTTCGTAGAAATTTCCC       | GGAACCGGTTTCGATTTCTCTC    |
